# Supplementary material for: Customizable, engineered substrates for rapid screening of cellular cues
Source: bioRxiv or medRxiv preprint supplement (doi:10.1101/693598), 2019-07-05
Supplement: Supplementary file [file media-1.pdf]

## Supporting Tables

**Supporting Table 1.** Overview of dimensions and resulting stiffness of high aspect ratio nanopillars.

Effective shear modulus calculated by combining equations (1) and (2):

$$\bar{G}' = \frac{3}{16} \left( \frac{d}{l} \right)^2 fE * \Delta k$$

| <b>Diameter Tip (nm)</b> | <b>Height (µm)</b> | <b>Pitch (µm)</b> | <b>Fill Factor</b> | <b>Individual pillar spring constant (k, pN/nm)</b> | <b>Poisson ratio (ν)</b> | <b>Effective Shear Modulus (<math>\bar{G}'</math>, kPa)</b> |
|--------------------------|--------------------|-------------------|--------------------|-----------------------------------------------------|--------------------------|-------------------------------------------------------------|
| 70                       | 2.35               | 1                 | 0.0044             | 3.9                                                 | 0.37                     | 9                                                           |
| 70                       | 1.6                | 1                 | 0.0044             | 10.6                                                | 0.37                     | 16                                                          |
| 90                       | 1.35               | 1                 | 0.0064             | 51.7                                                | 0.37                     | 70                                                          |
| 100                      | 1.9                | 0.5               | 0.0314             | 11.4                                                | 0.37                     | 87                                                          |
| 115                      | 1.95               | 1                 | 0.0104             | 47.8                                                | 0.37                     | 93                                                          |

**Supplementary Table 2.** Primers used for measuring gene expression of cardiomyogenic, chondrogenic and osteogenic function.

| <b>Mouse gene name</b>                                            |     | <b>Primer Sequence</b>    | <b>Amplicon size</b> |
|-------------------------------------------------------------------|-----|---------------------------|----------------------|
| 18s ribosomal RNA<br>(housekeeping gene)                          | Fwd | AAGTCCCTGCCCTTTGTACACA    | 100                  |
|                                                                   | Rev | GATCCGAGGGCCTCACTAAAC     |                      |
| <i>COL1A1</i> (Collagen type 1<br>alpha 1 chain)                  | Fwd | AACGAGATCGAGCTCAGAGG      | 99                   |
|                                                                   | Rev | GACTGTCTTGCCCCAAGTTC      |                      |
| <i>COL2A1</i> (Collagen type 2<br>alpha 1 chain)                  | Fwd | ACGAAGCGGCTGGCAACCTCA     | 73                   |
|                                                                   | Rev | CCCTCGGCCCTCATCTCTACATCA  |                      |
| <i>COL10A1</i> (Collagen type 10<br>alpha 1 chain)                | Fwd | TTCTCCTACCACGTGCATGTG     | 191                  |
|                                                                   | Rev | AGGCCGTTTGATTCTGCATT      |                      |
| <i>ACAN</i> (Aggrecan)                                            | Fwd | GTGAGGACCTGGTAGTGCGAGTGA  | 103                  |
|                                                                   | Rev | GAGCCTGGGCGATAGTGGAATATA  |                      |
| <i>SOX9</i> (SRY-Box 9)                                           | Fwd | GGAAGGGAGAGAGAGAGAGAAA    | 138                  |
|                                                                   | Rev | CGGGATTTAAGGCTCAAGGT      |                      |
| <i>RUNX2</i> (Runx family<br>transcription factor 2)              | Fwd | AAGTGCGGTGCAAACCTTCT      | 90                   |
|                                                                   | Rev | TCTCGGTGGCTGCTAGTGA       |                      |
| <i>OCN</i> (Osteocalcin)                                          | Fwd | CTGACCTCACAGATGCCAAG      | 98                   |
|                                                                   | Rev | GTAGCGCCGGAGTCTGTTC       |                      |
| <i>OPN</i> (Osteopontin)                                          | Fwd | TCAGGACAACAACGGAAAGGG     | 139                  |
|                                                                   | Rev | GGAACCTTGCTTGACTATCGATCAC |                      |
| <i>MYOG</i> (Myogenin)                                            | Fwd | GAGACATCCCCCTATTTCTACCA   | 106                  |
|                                                                   | Rev | GCTCAGTCCGCTCATAGCC       |                      |
| <i>MYH7</i> (Myosin heavy chain<br>7)                             | Fwd | CTCAAGCTGCTCAGCAATCTATTT  | 153                  |
|                                                                   | Rev | GGAGCGCAAGTTTGTGATAAGT    |                      |
| <i>ASF1B</i> (Anti-silencing<br>function 1B histone<br>chaperone) | Fwd | CCTCCGGTTCGAGATCAGC       | 185                  |
|                                                                   | Rev | GGATGGGTTTGGGGCATCAG      |                      |
